# Supplementary material
Source: MDPI journal article supplement (https://www.mdpi.com/2225-1146/11/1/6)
Supplement: s1 [file s1]

Archive with 1 entries (1 files):
- econometrics-2050395-supplementary.pdf
